# Supplementary material for: Willingness for COVID-19 Vaccination and Influencing factors in Nurses from Tangshan City, China: A Cross-sectional Study
Source: Research Square preprint supplement (doi:10.21203/rs.3.rs-275435/v1), 2021-03-11
Supplement: Supplementary file 1 [file 7eb1af8b7830f6a0adb59c6b.docx]

**Questionnaire**

**Distinguished nurses,**

**We are from North China University of Science and Technology Affiliated University. We make this health service survey is to learn the willingness to receive the Covid-19 vaccines among nurses. The results are used for statistical analysis, and your and your family’s information will be kept confidential. Hope that you can help us finish this questionnaire. Thanks for your support.**

1.Sex: ①Male ②Female

2.Age:

3.Residence: ①City ②Village

4.You now live in: District (County), City, Province

5. Education:①Technical secondary school ②Junior collage ③Bachelor’s degree or above

6.Marital status: ①Single ②Married

7.Monthly income:

①¥3,000 or lower ②¥3,001-5,000 ③¥5,001-10,000 ④¥10,000

8.Years of working: ①＜5 ②5～ ③10～ ④20～

9.Job title: ① Nurse ②Nurse practitioner ③Nurse-in-charge ④Associate senior nurse ⑤Senior nurse

10.Department:①Dept. of Internal Medicine ②Surgical Dept. ③ICU/ Emergency Dept. ④Dept. of Infectious Diseases ⑤Other

11. Grade of your hospital: ①Class-1 hospital ②Class-2 hospital ③Class-3 hospital

12. If all ages of people can accept the Covid-19 vaccine, do you want to get the vaccine? ①Yes (to Q12.1) ②No(to Q12.2)

12.1 Could you please tell the reason why you want to get the vaccine? (Multiple)

①concerned to be infected

②Herd immunity. You and others will benefit from that.

③Because of your work. The risk of infection is relatively high, so you need to get the vaccine.

④People around you all want to receive the vaccine

⑤It’s free to get the vaccine

⑥Other：

12.2 Could you please tell the reason(s) why you do not want to receive the vaccine? (Multiple)

①Concern about the safety of vaccine

②Concern about the effectiveness of vaccine

③Concern that the vaccine would be costly

④Concern that there might be fake vaccines

⑤Other:

13.Are you willing to recommend the Covid-19 vaccine to others? ①Yes (to Q13.1) ②No (to Q13.2)

13.1 Could you tell the reason why you want to recommend the vaccine to others? (Multiple)

①Avoid infection of Covid-19

②Herd immunity will be achieved of everyone gets the vaccine

③It’s free to receive vaccine

④Other:

13.2 Could you tell the reason why you do not want to recommend the vaccine to others? (Multiple)

①The vaccine has not been universally received. So, you need to wait

②You have not received the vaccine, so you don’t want to recommend

③Afraid of safety and effectiveness of the vaccine

④Other:

14.Your opinion on sales of the vaccine:

①Support: it’s an effective way to avoid infection

②Support: but government subsidy is needed

③Neutral: the long-term effect and side effect of the vaccine needs to be investigated

④Oppose: the vaccine is ineffective on the variants of Covid-19 will make

15.The influence of Covid-19 on your life:

①Not a little ②A little ③Relatively large ④Huge influence

16.Have you inquired or searched the information of the Covid-19 vaccine: ①Yes ②No

17. If there’s a new vaccine product introduced to the market, please suggest the acceptable price:

①＜¥50 ②¥50～ ③¥100～ ④¥200～
